# Supplementary material for: Epoxy-based vitrimeric semi-interpenetrating network/MXene nanocomposites for hydrogen gas barrier applications
Source: Royal Society of Chemistry journal article supplement (doi:10.1039/d4nr04702h), 2025-01-01
Supplement: d4nr04702h1.pdf [file d4nr04702h1.pdf]

## Supporting Information

### **Epoxy-Based Vitrimeric Semi-Interpenetrating Network/MXene Nanocomposites for Hydrogen Gas Barrier Application**

Anandarup Bhattacharyya<sup>a</sup>, Subhabrata Saha<sup>a,b</sup>, Sambedan Jena<sup>a</sup>, Hoang Tuan Nguyen<sup>a</sup>, Duy Thanh Tran<sup>a</sup>, Nam Hoon Kim<sup>a,d,\*\*</sup>, Joong Hee Lee<sup>a,c,d\*</sup>

<sup>a</sup> Department of Nano Convergence Engineering, Jeonbuk National University, Jeonju, Jeonbuk 54896, Republic of Korea.

<sup>b</sup> Manufacturing Science Division, Oak Ridge National Laboratory, Knoxville, TN, 37932, USA.

<sup>c</sup> Carbon Composite Research Centre, Department of Polymer & Nanoscience and Technology, Jeonbuk National University, Jeonju, Jeonbuk, 54896, Republic of Korea.

<sup>d</sup> AHES Co., 445 Techno Valley-ro, Bongdong-eup, Wanju-gun, Jeonbuk, 55314, Republic of Korea.

\*Email: [nhk@jbnu.ac.kr](mailto:nhk@jbnu.ac.kr) ; [jhl@jbnu.ac.kr](mailto:jhl@jbnu.ac.kr)

### Synthesis procedure of MXene ( $\text{Ti}_3\text{C}_2\text{T}_x$ ) from MAX phase ( $\text{Ti}_3\text{AlC}_2$ )

The synthesis of MXene was undergone via the selective etching of Aluminium (Al) from the MAX phase using LiF/HCl. Firstly, LiF powder (4.8 g) was added to HCl (9 M), and the mixture was kept in an oil bath under 30 min of stirring at 35 °C. Next, the MAX phase (3 g) was added gradually while keeping a constant rate of stirring to prevent overheating. The reaction was allowed to proceed at 35 °C for 24 h. After this entire process, the reaction suspension was washed using deionized (DI) water and the precipitate was centrifuged at 7000 rpm for 10 min. This process continued till the pH of the suspension exceeded by 6, assuring the removal of acidic and etched waste with pH neutralization. Furthermore, the final precipitate was redispersed in DI water, purged with nitrogen ( $\text{N}_2$ ) gas for 30 min, and ultrasonicated for 1 h under ice bath conditions. After that, the redispersed solution was centrifuged at 4000 rpm for 20 min, and the supernatant was collected in a glass vial. At last, the delaminated MXene was collected using the vacuum freeze-drying method for the as-prepared supernatant.

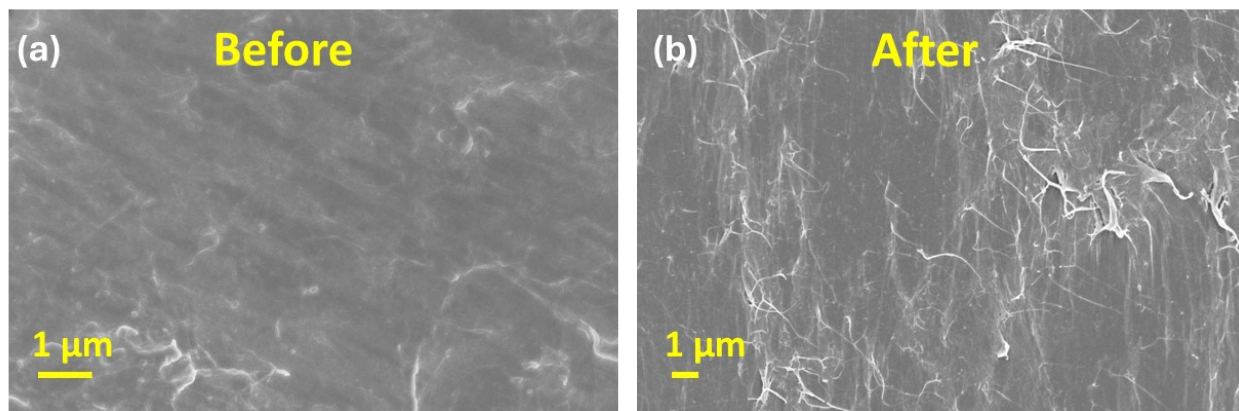

**Fig. S1** (a) and (b) FE-SEM images of the EEP film before and after dipping into DMSO, respectively.

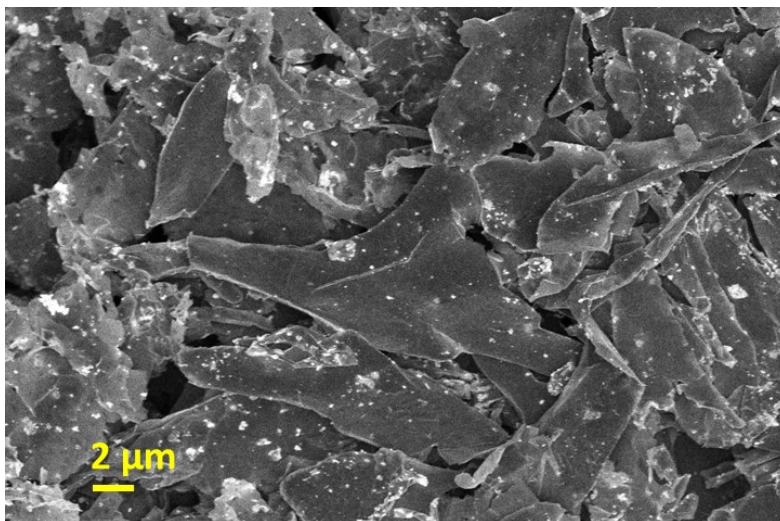

**Fig. S2** FESEM scan images of MXene at low magnification showing distribution of flake size.

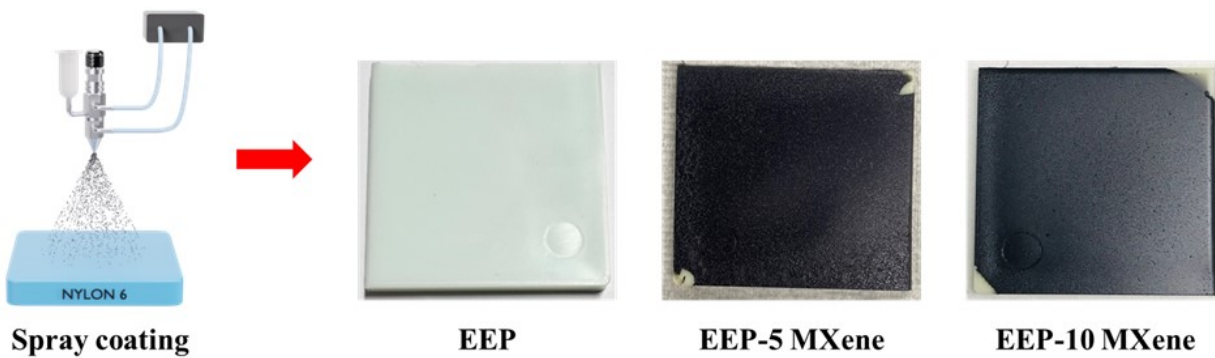

**Fig. S3** Representative spray-coated nylon 6 substrates of EEP, EEP-5 MXene, and EEP-10 MXene.

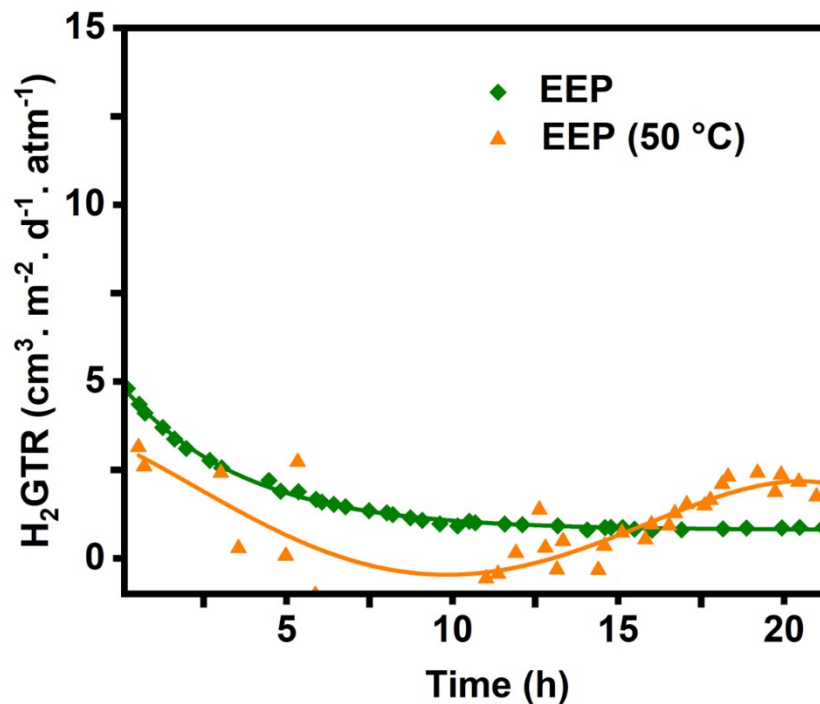

Fig. S4 Compare H<sub>2</sub>GTR curves of EEP coated nylon 6 at ambient temperature (RT) and 50 °C.

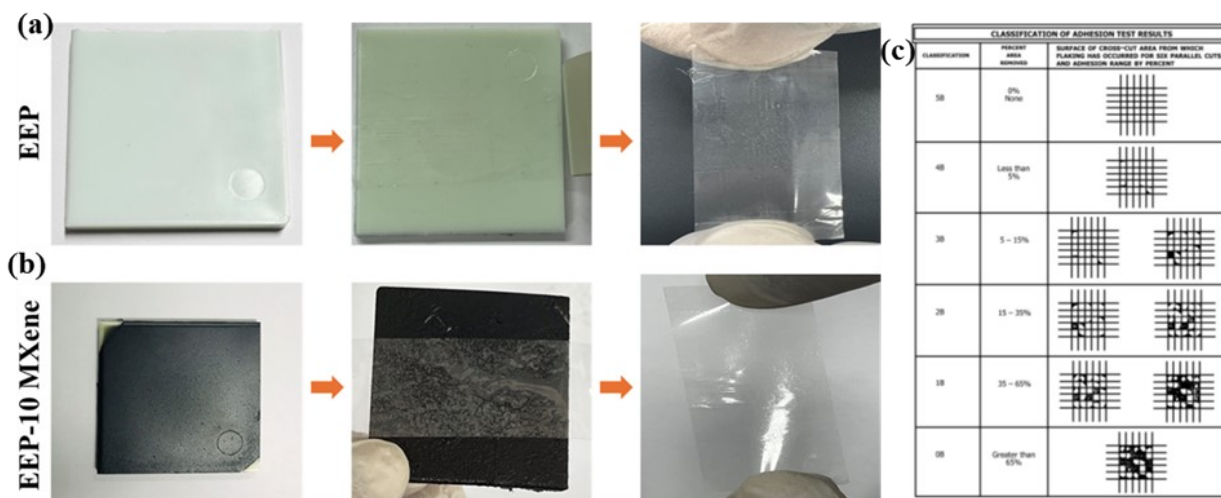

Fig. S5 Analysis of the peel-off adhesion test of coated nylon 6 samples as per ASTM D3359-17, (a) EEP coating; (b) EEP-10 MXene coating; (c) ASTM standard D3359- 17.

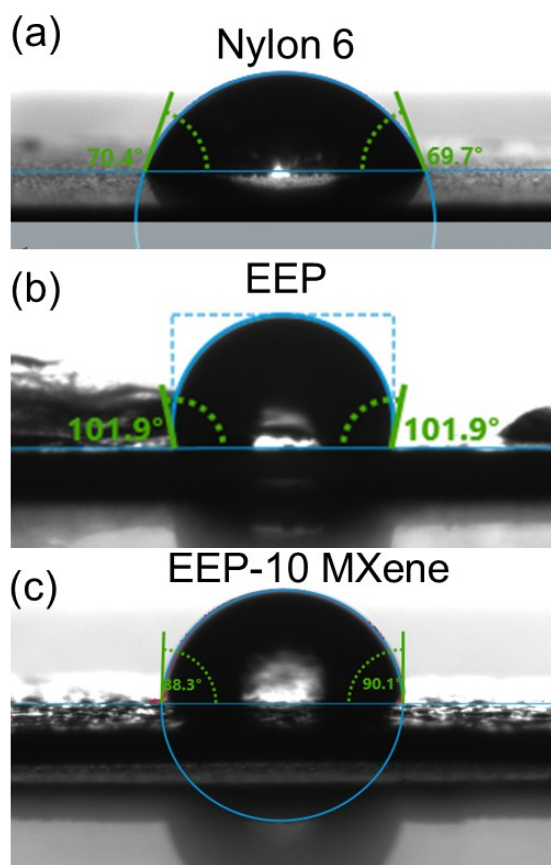

**Fig. S6** Water contact angle of (a) uncoated Nylon 6, coated with (b) EEP and (c) EEP-10 MXene at ambient temperature.

**Table S1** Atomic wt.% of the constitutive elements in MXene and f-MXene from XPS

| Composition | Atomic (%) |       |       |       |      |
|-------------|------------|-------|-------|-------|------|
|             | C1s        | Ti2p  | O1s   | F1s   | B1s  |
| MXene       | 37.69      | 25.38 | 16.61 | 20.32 | -    |
| f-MXene     | 41.51      | 32.7  | 24.7  | 23.29 | 1.08 |

**Table S2** Comparison of the H<sub>2</sub>GTR values obtained from the present work with the previously reported values of 2D filler-based coated polymer nanocomposite films

| Films                         | Filler loading (wt.%) | Substrate                   | H <sub>2</sub> GTR <sup>a</sup> | Decrement in H <sub>2</sub> GTR compared to substrate (%) | P <sub>1</sub> <sup>b</sup> |
|-------------------------------|-----------------------|-----------------------------|---------------------------------|-----------------------------------------------------------|-----------------------------|
| HPEI/rGO <sup>1</sup>         | 16.6                  | PET/Spray coating           | 8.0                             | 95                                                        | ~0.96                       |
| Chitosan/PAA/rGO <sup>2</sup> | -                     | PET/Layer-by-layer assembly | 102.3                           | 44                                                        | -                           |
| PVOH/GO <sup>3</sup>          | 80                    | PET/Spray coating           | 5                               | 96                                                        | 0.56                        |
| PEI/GO <sup>4</sup>           | -                     | PET/Layer-by-layer assembly | 158.1                           | 41                                                        | ~0.04                       |
| MAPP/mGO-ODA <sup>5</sup>     | 60                    | Nylon/Spray coating         | 10.6                            | 94                                                        | 0.26                        |
| EVOH/BA/GO <sup>6</sup>       | 5                     | Nylon/Spray coating         | 6.9                             | 96.1                                                      | ~0.15                       |
| PU/TET-mGO <sup>7</sup>       | 22                    | Nylon/Spray coating         | 12.8                            | 93                                                        | 0.15                        |
| PU/rGO-HA <sup>8</sup>        | 43.3                  | Nylon/Spray coating         | 32                              | 82                                                        | 0.40                        |
| f-MXene-GO/EAA <sup>9</sup>   | 10                    | Nylon/Spray coating         | 2.01                            | 89                                                        | 0.029                       |
| S-IPN2/f-GO-BN <sup>10</sup>  | 5 and 10              | Nylon/Spray coating         | 0.9 and 0.5                     | 95 and 97                                                 | 0.01 and 0.006              |
| S-IPN/h-MXene <sup>11</sup>   | 10                    | Nylon/Spray coating         | 0.3                             | 98%                                                       | 0.01                        |
| MXene/EEP<br>(Present work)   | 10                    | Nylon/Spray coating         | 0.03                            | 99.8                                                      | ~0.002                      |

<sup>a</sup> Hydrogen gas transmission rate of the coated film (cc·m<sup>-2</sup>·d<sup>-1</sup>·atm<sup>-1</sup>).

<sup>b</sup> Hydrogen gas permeability coefficient of the coating layer (cc·mm·m<sup>-2</sup>·d<sup>-1</sup>·atm<sup>-1</sup>).

## REFERENCES

1. W. B. Park, P. Bandyopadhyay, T. T. Nguyen, T. Kuila, N. H. Kim and J. H. Lee, *Composites Part B: Engineering*, 2016, **106**, 316-323.
2. P. Tzeng, B. Stevens, I. Devlaming and J. C. Grunlan, *Langmuir*, 2015, **31**, 5919-5927.
3. R. K. Layek, A. K. Das, M. U. Park, N. H. Kim and J. H. Lee, *Journal of Materials Chemistry A*, 2014, **2**.
4. Y. H. Yang, L. Bolling, M. A. Priolo and J. C. Grunlan, *Advanced Materials*, 2013, **25**, 503-508.
5. X. Li, P. Bandyopadhyay, T. T. Nguyen, O.-k. Park and J. H. Lee, *Journal of Membrane Science*, 2018, **547**, 80-92.
6. X. Li, P. Bandyopadhyay, M. Guo, N. H. Kim and J. H. Lee, *Carbon*, 2018, **133**, 150-161.
7. P. Bandyopadhyay, T. T. Nguyen, X. Li, N. H. Kim and J. H. Lee, *Composites Part B: Engineering*, 2017, **117**, 101-110.
8. P. Bandyopadhyay, W. B. Park, R. K. Layek, M. E. Uddin, N. H. Kim, H.-G. Kim and J. H. Lee, *Journal of Membrane Science*, 2016, **500**, 106-114.
9. O. B. Seo, S. Saha, N. H. Kim and J. H. Lee, *Journal of Membrane Science*, 2021, **640**.
10. S. Saha, W. Son, N. H. Kim and J. H. Lee, *Journal of Materials Chemistry A*, 2022, **10**, 4376-4391.
11. W. Son, S. Saha, D. T. Tran, N. H. Kim and J. H. Lee, *Carbon*, 2024, **228**.
